# Supplementary material for: Improvement of performance of a Au–Cu/AC catalyst using thiol for acetylene hydrochlorination reaction
Source: Royal Society of Chemistry journal article supplement (doi:10.1039/c5ra24584b), 2015-12-23
Supplement: c5ra24584b1.pdf [file c5ra24584b1.pdf]

## **Improvement of performance of Au-Cu/AC catalyst using thiol for acetylene hydrochlorination reaction**

Guotai Hong<sup>a</sup>, Xiaohui Tian<sup>a</sup>, BinBo Jiang<sup>\*a</sup>, Zuwei Liao<sup>a</sup>, Jingdai Wang<sup>a</sup>, Yongrong Yang<sup>ab</sup>,

Jie Zheng<sup>c</sup>

<sup>a</sup>State Key Laboratory of Chemical Engineering, College of Chemical and Biological Engineering,  
Zhejiang University, Hangzhou 310027, Zhejiang, China

<sup>b</sup>Shanghai Key Laboratory of Catalysis Technology for Polyolefins, Shanghai 200062, China

<sup>c</sup>Department of Chemical and Biomolecular Engineering, The University of Akron, Akron, Ohio,  
USA 44325

## Results

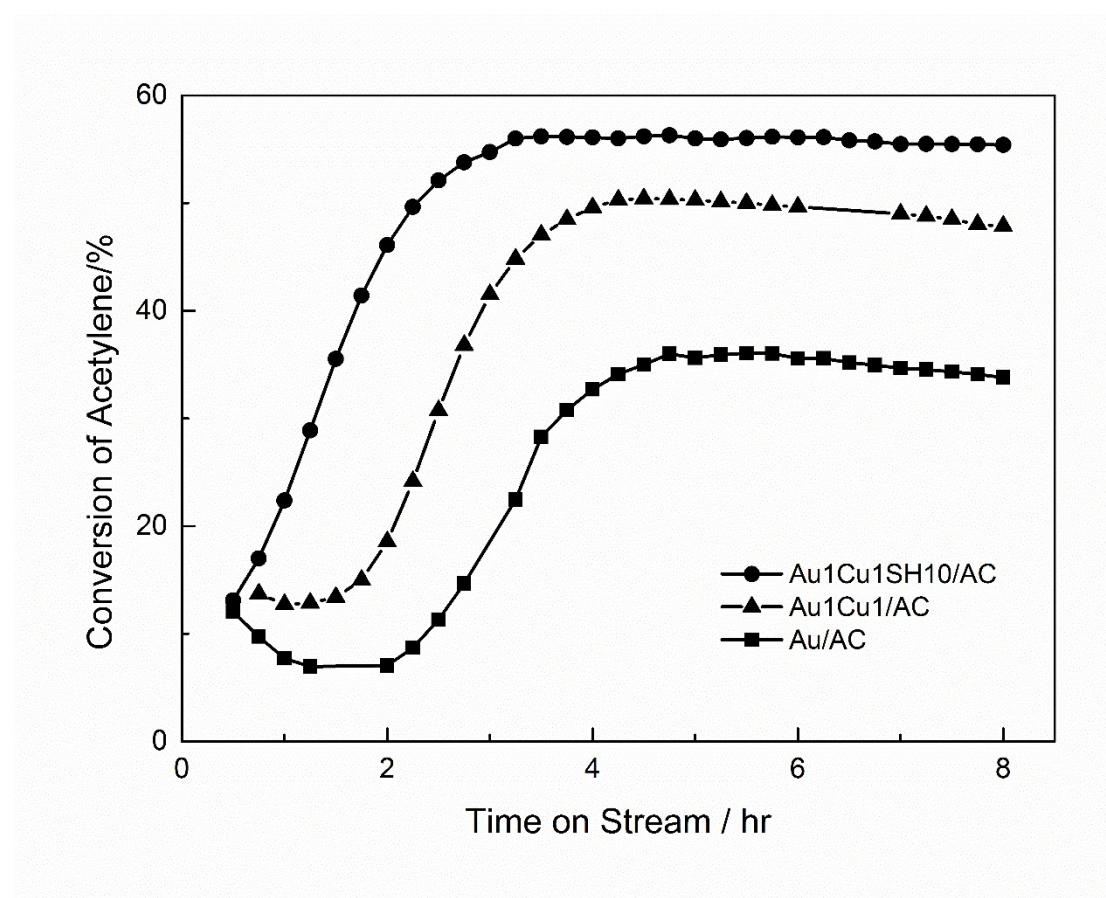

Fig. S1 Catalytic activity of Au/AC, Au1Cu1/AC and Au1Cu1SH10/AC catalysts.

Reaction conditions: Temp=180 °C; GHSV(C<sub>2</sub>H<sub>2</sub>)=1200 h<sup>-1</sup>; V<sub>HCl</sub>/V<sub>C<sub>2</sub>H<sub>2</sub></sub>=1.13.

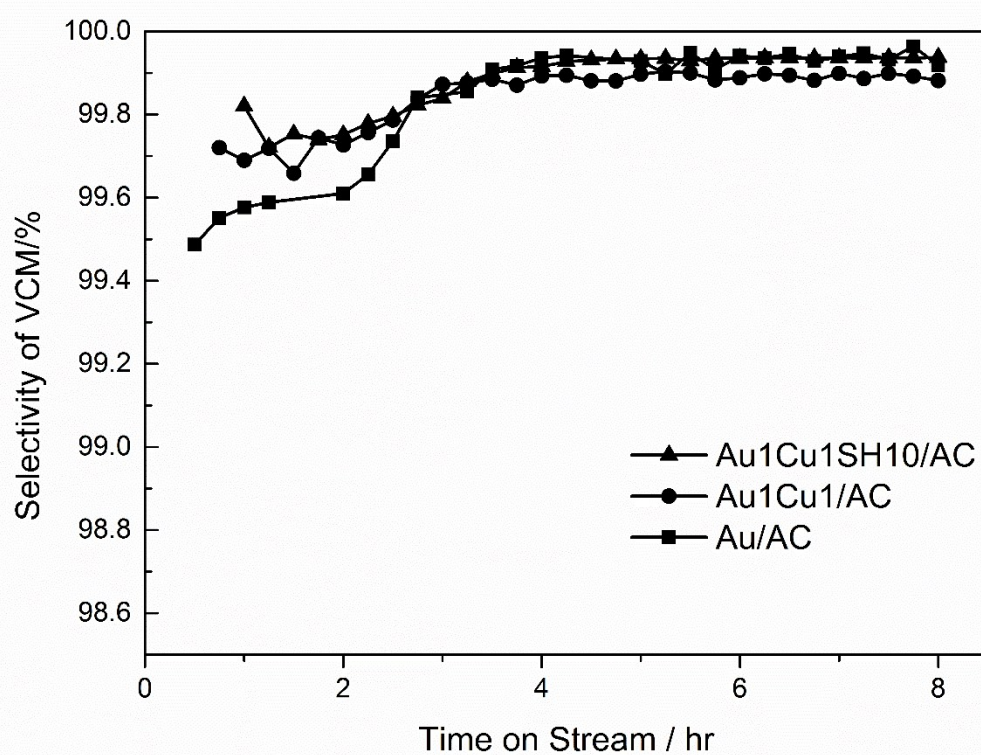

Fig. S2 Selectivity of Au/AC, Au1Cu1/AC and Au1Cu1SH10/AC catalysts.

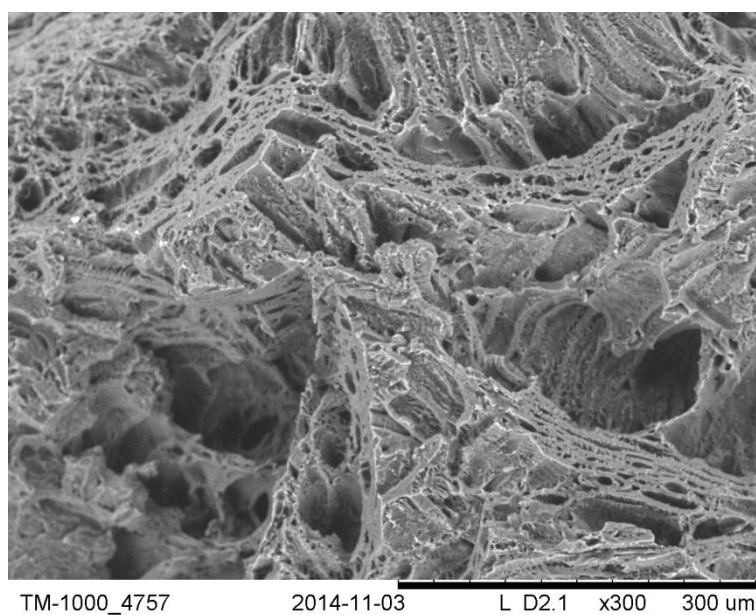

Fig. S3 Morphology of activated carbon.

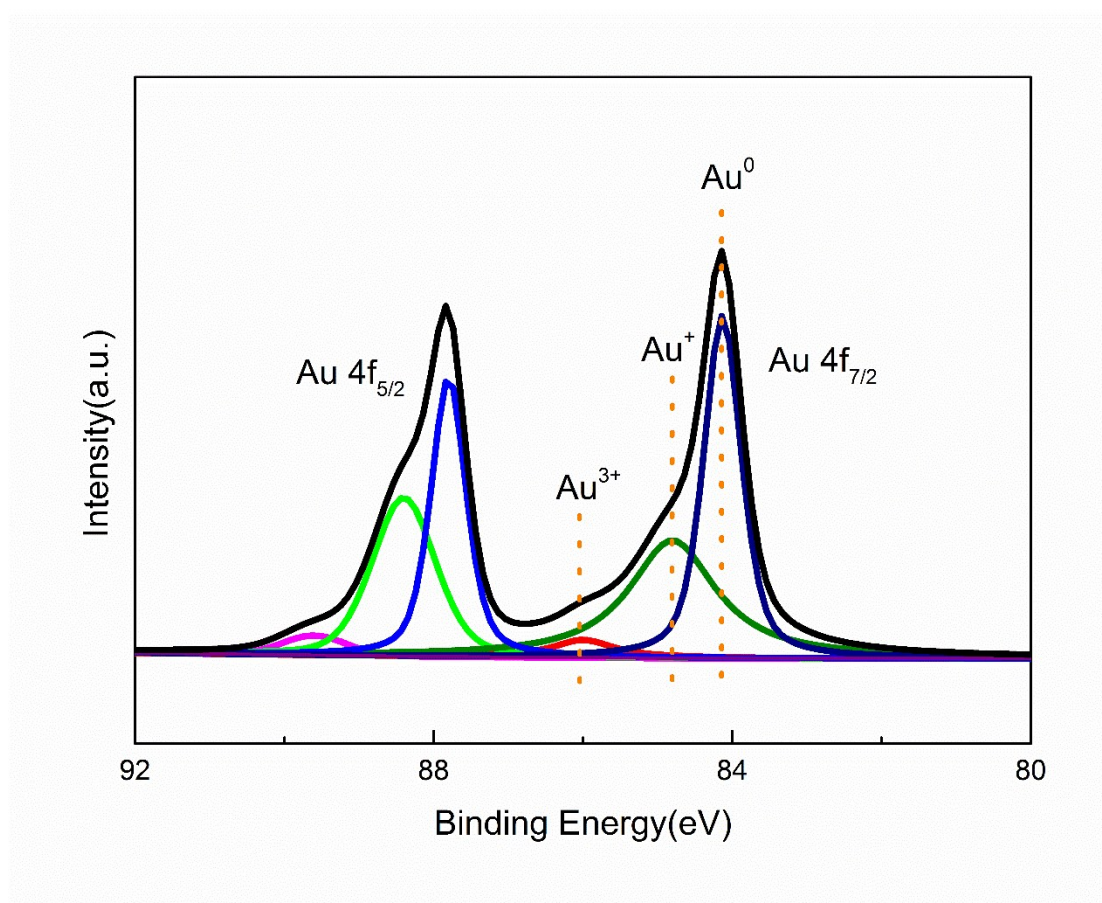

Fig. S4 XPS Au4f spectrums of Au/AC fresh catalyst.

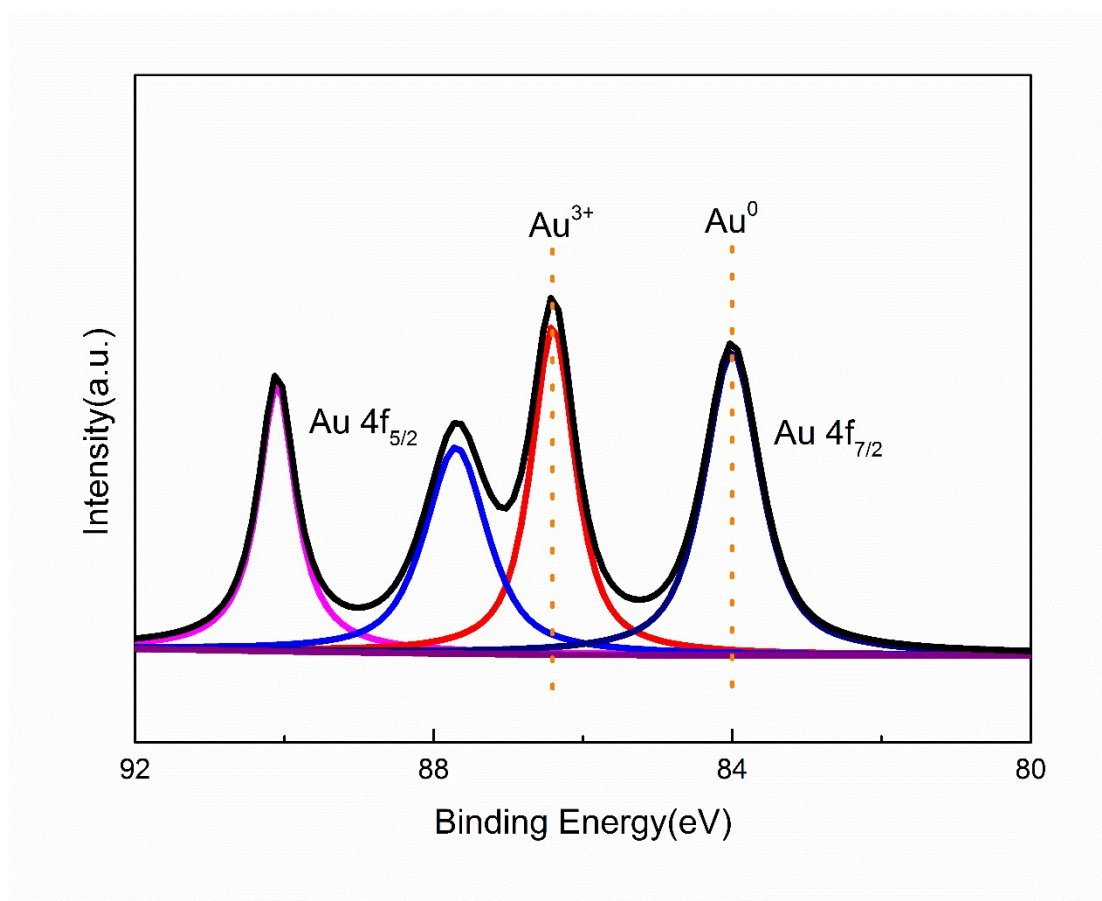

Fig. S5 XPS Au4f spectrums of Au/AC used catalyst.



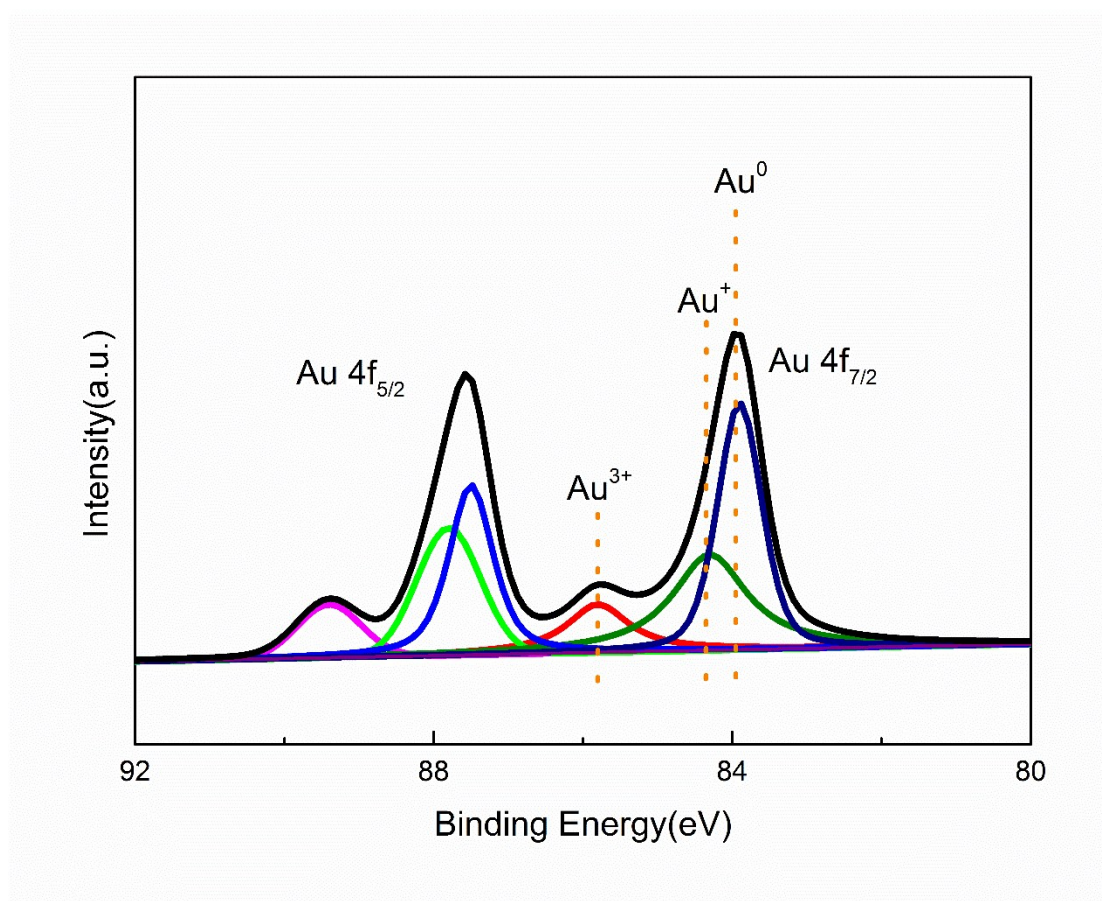

Fig. S6 XPS Au4f spectrums of Au<sub>1</sub>Cu<sub>1</sub>/AC fresh catalyst.

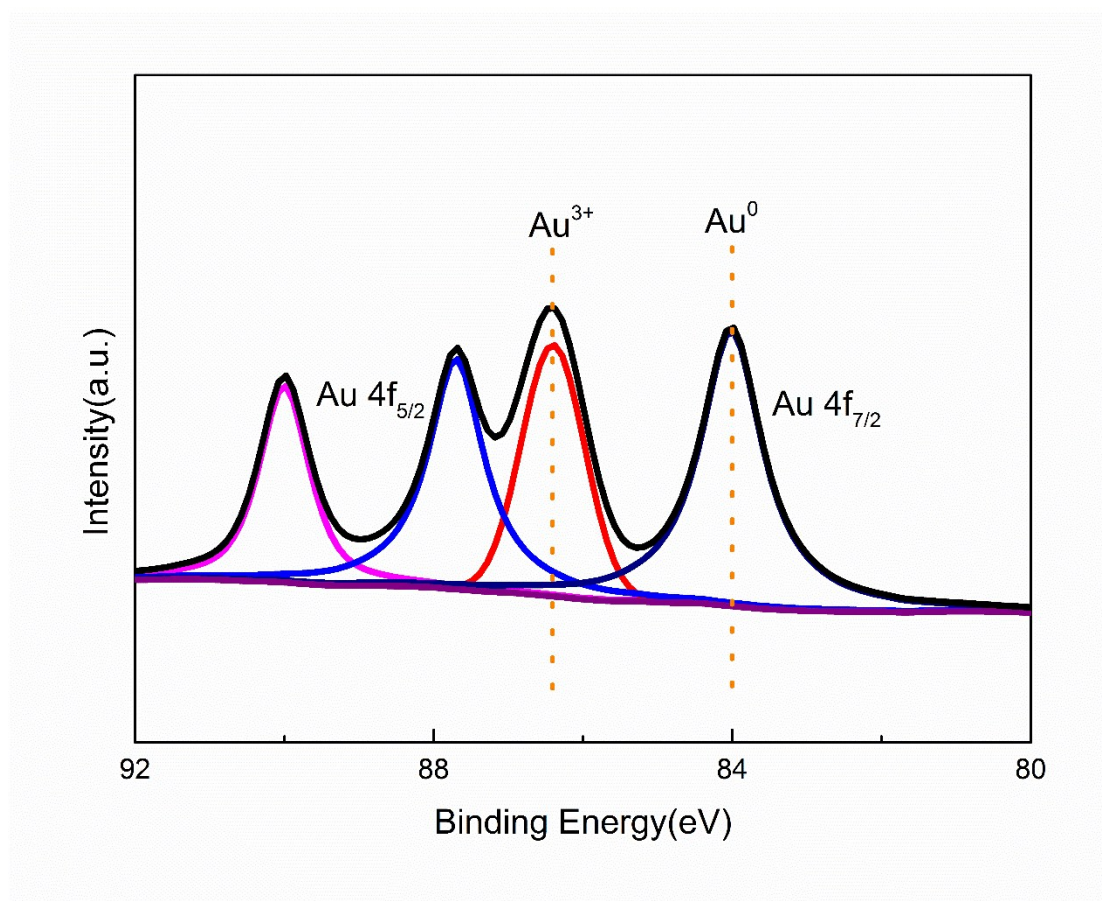

Fig. S7 XPS Au4f spectrums of Au<sub>1</sub>Cu<sub>1</sub>/AC used catalyst.



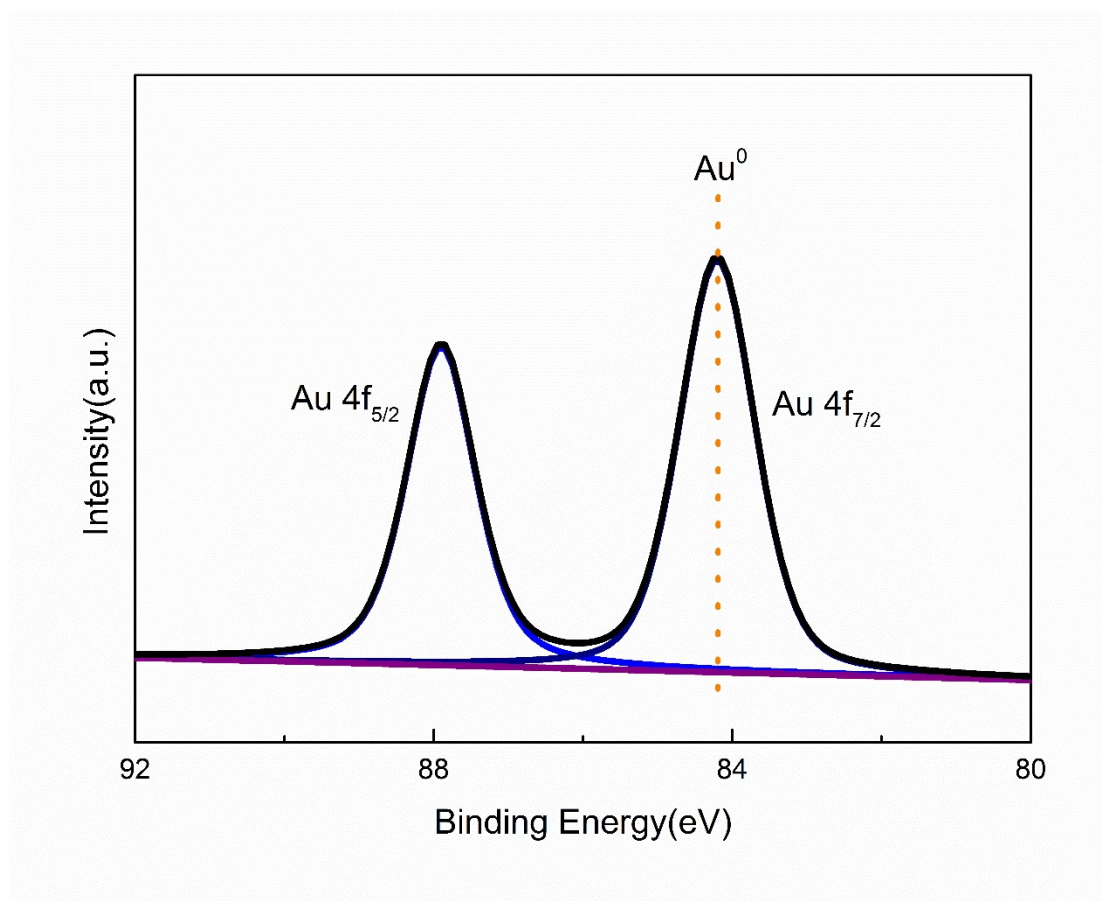

Fig. S8 XPS Au4f spectrums of Au<sub>1</sub>Cu<sub>1</sub>SH<sub>10</sub>/AC fresh catalyst.

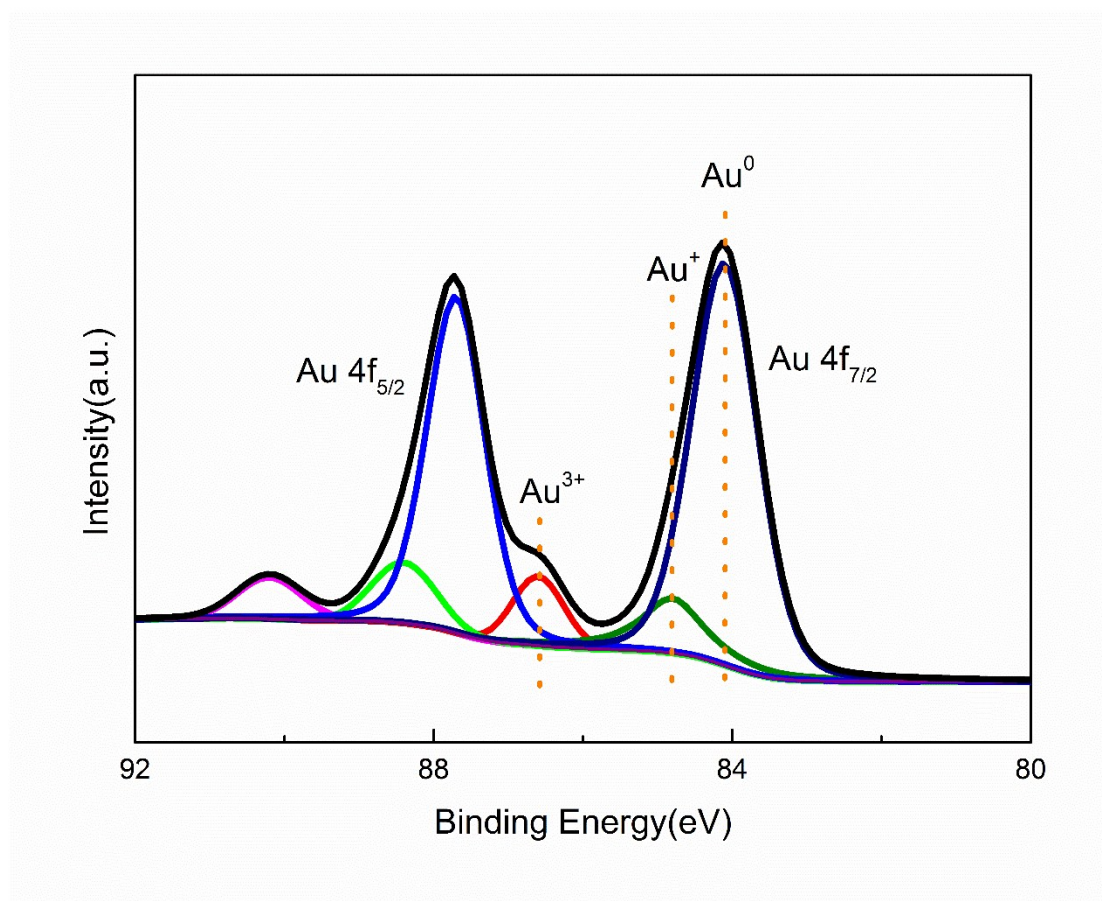

Fig. S9 XPS Au4f spectrums of Au<sub>1</sub>Cu<sub>1</sub>SH<sub>10</sub>/AC used catalyst.

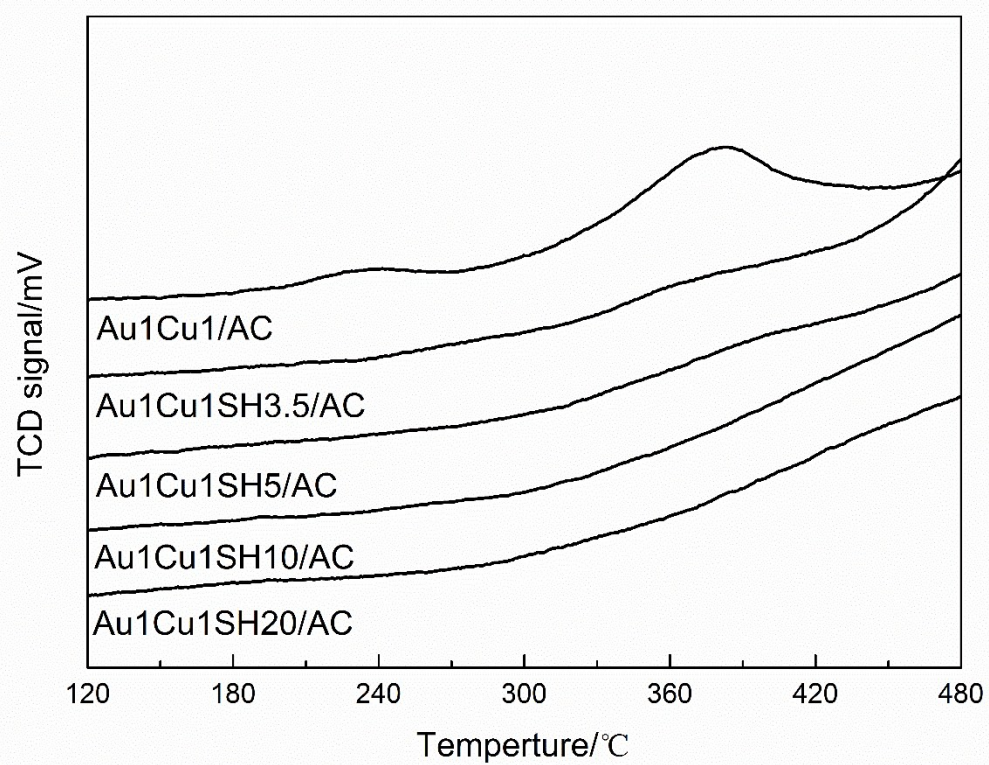

Fig. S10 H<sub>2</sub>-TPR profiles of Au<sub>1</sub>Cu<sub>1</sub>SH<sub>y</sub>/AC series fresh catalysts.

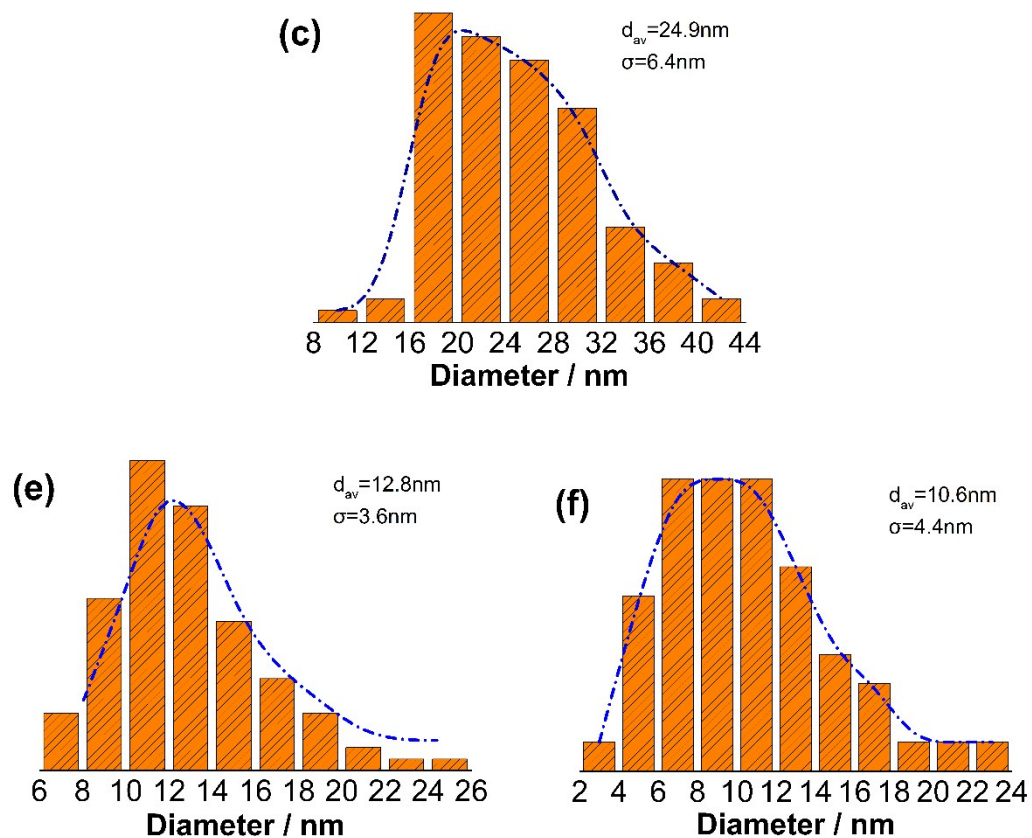

Fig. S11 Particle size distribution of (c)Au<sub>1</sub>Cu<sub>1</sub>/AC-fresh, (e)Au<sub>1</sub>Cu<sub>1</sub>SH<sub>10</sub>/AC-fresh and (f)Au<sub>1</sub>Cu<sub>1</sub>SH<sub>10</sub>/AC-used.
